# Supplementary material for: Spatio-temporal variability of surface turbulent heat flux feedback for mesoscale sea surface temperature anomaly in the global ocean
Source: Frontiers journal article supplement (doi:10.3389/fmars.2022.957796), 2022-10-05
Supplement: Data_Sheet_1.docx [file Data_Sheet_1.docx]

Supplementary Material

## Supplementary Figures

**
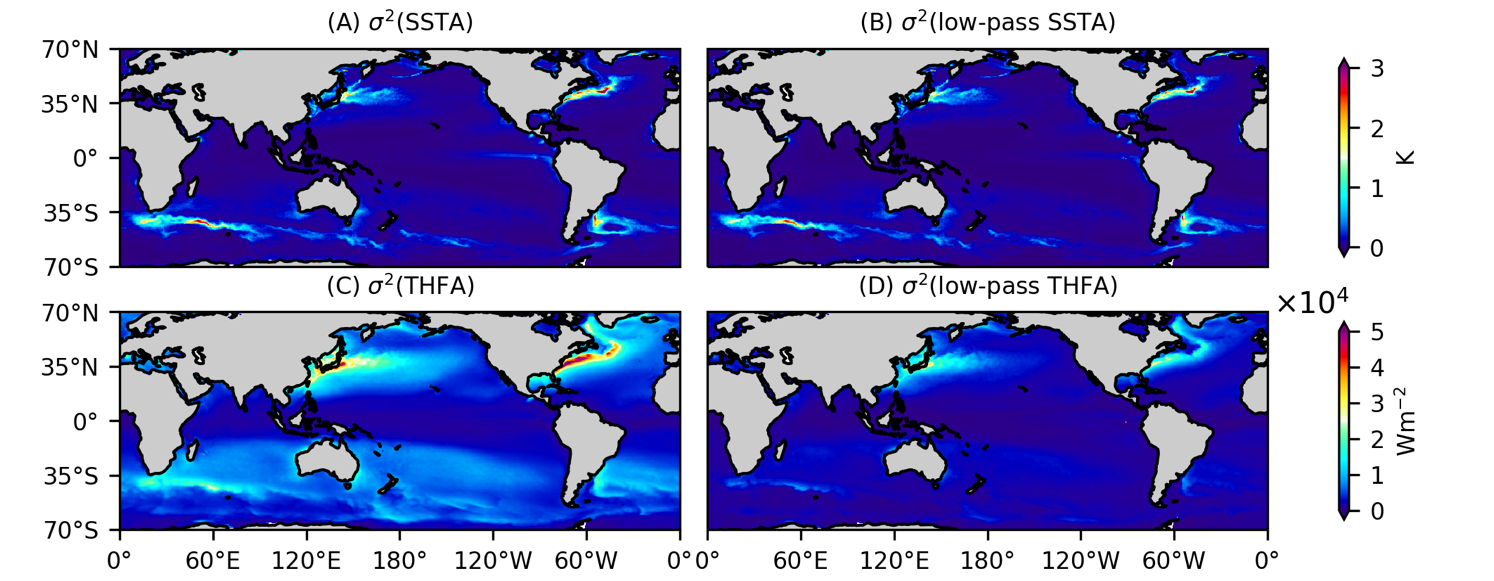
**

**Supplementary Fig. S1** Variance of **(A)** mesoscale SSTA, **(B)** 5-day running mean mesoscale SSTA, **(C)** mesoscale surface turbulent heat flux anomaly (THFA) and **(D)** 5-day running mean mesoscale THFA in the global ocean.

**
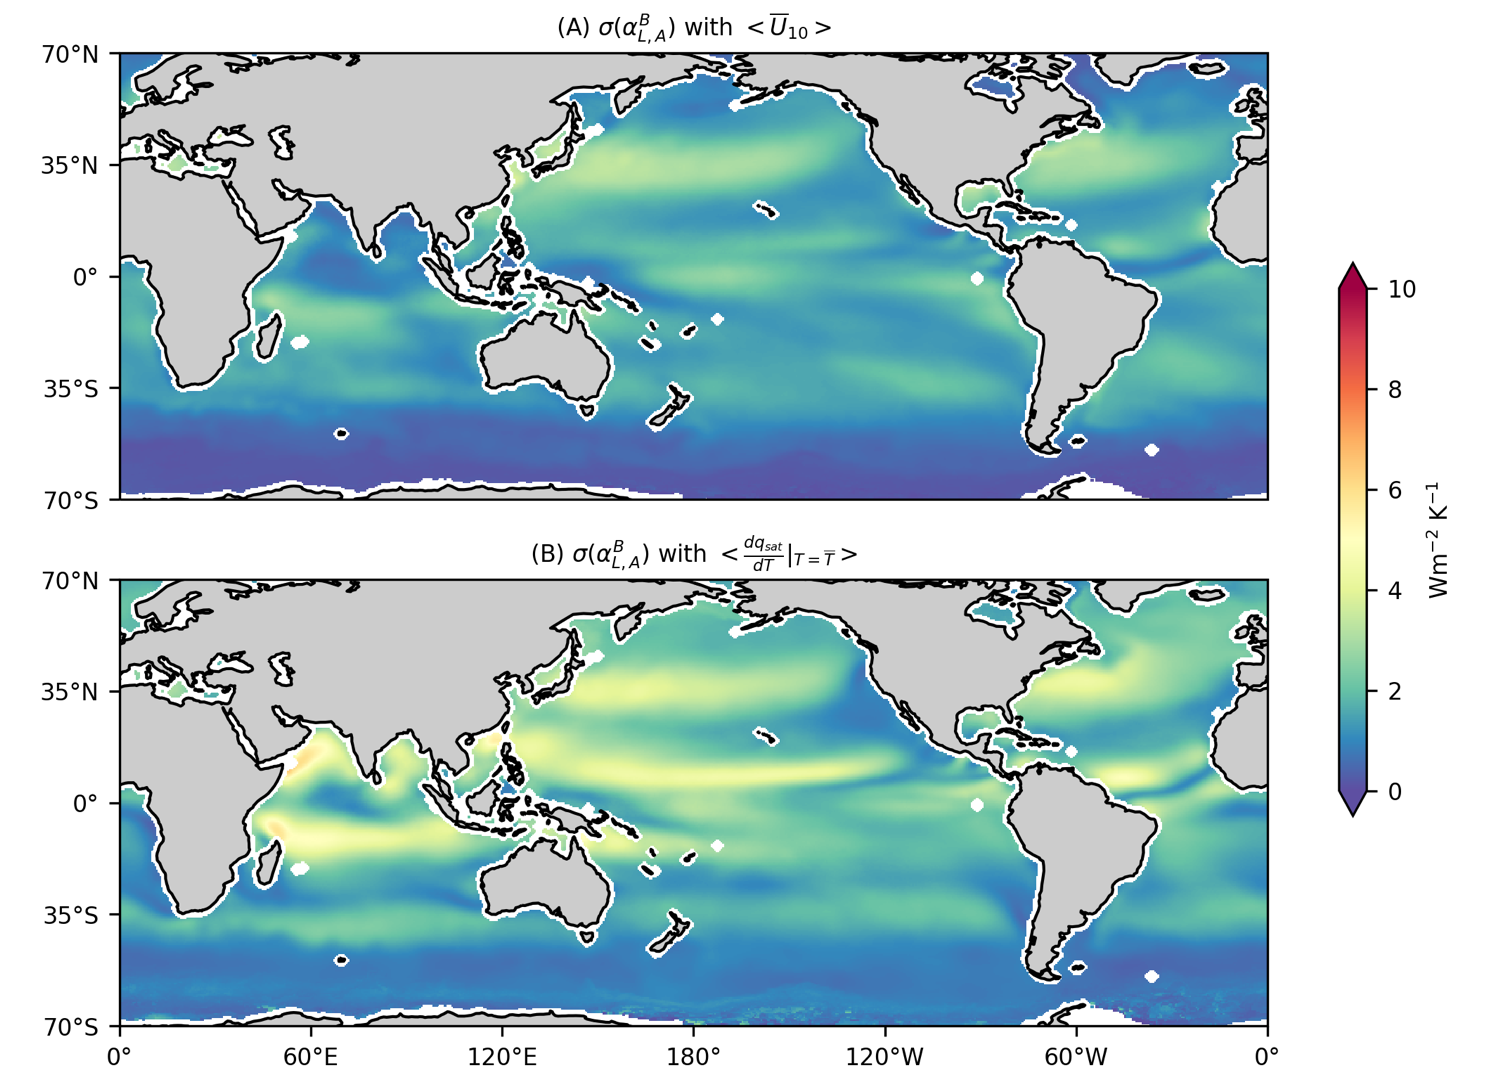
**

**Supplementary Fig. S2** Standard deviation of recomputed by using (A) time-mean and (B) time-mean .


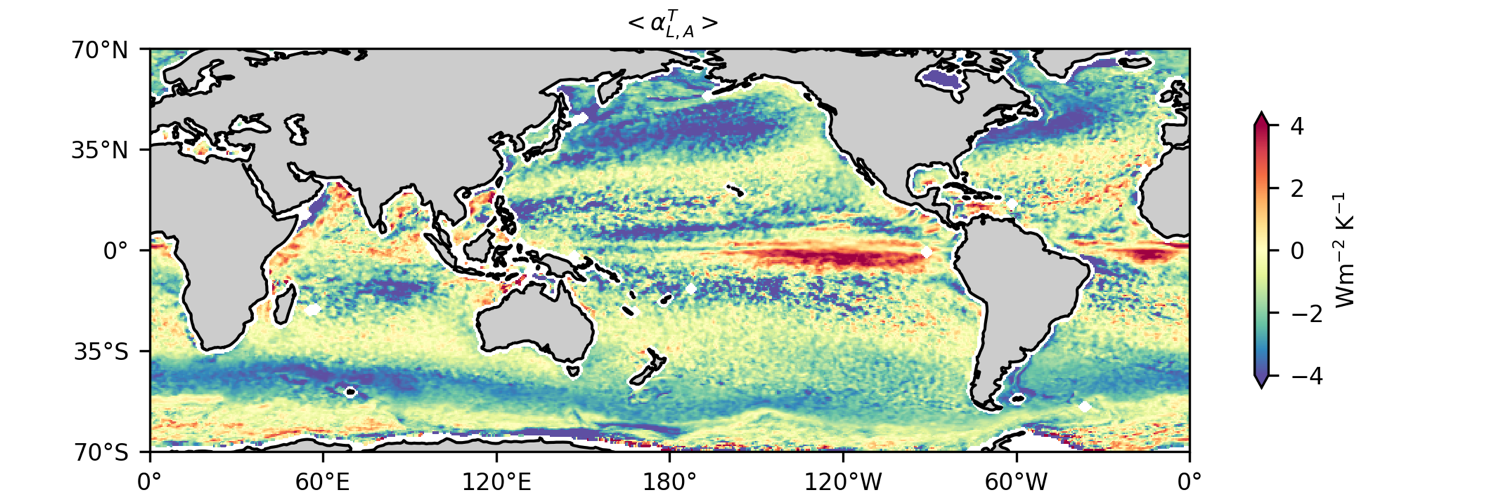


**Supplementary Fig. S****3** recomputed by the classical constant regression model.


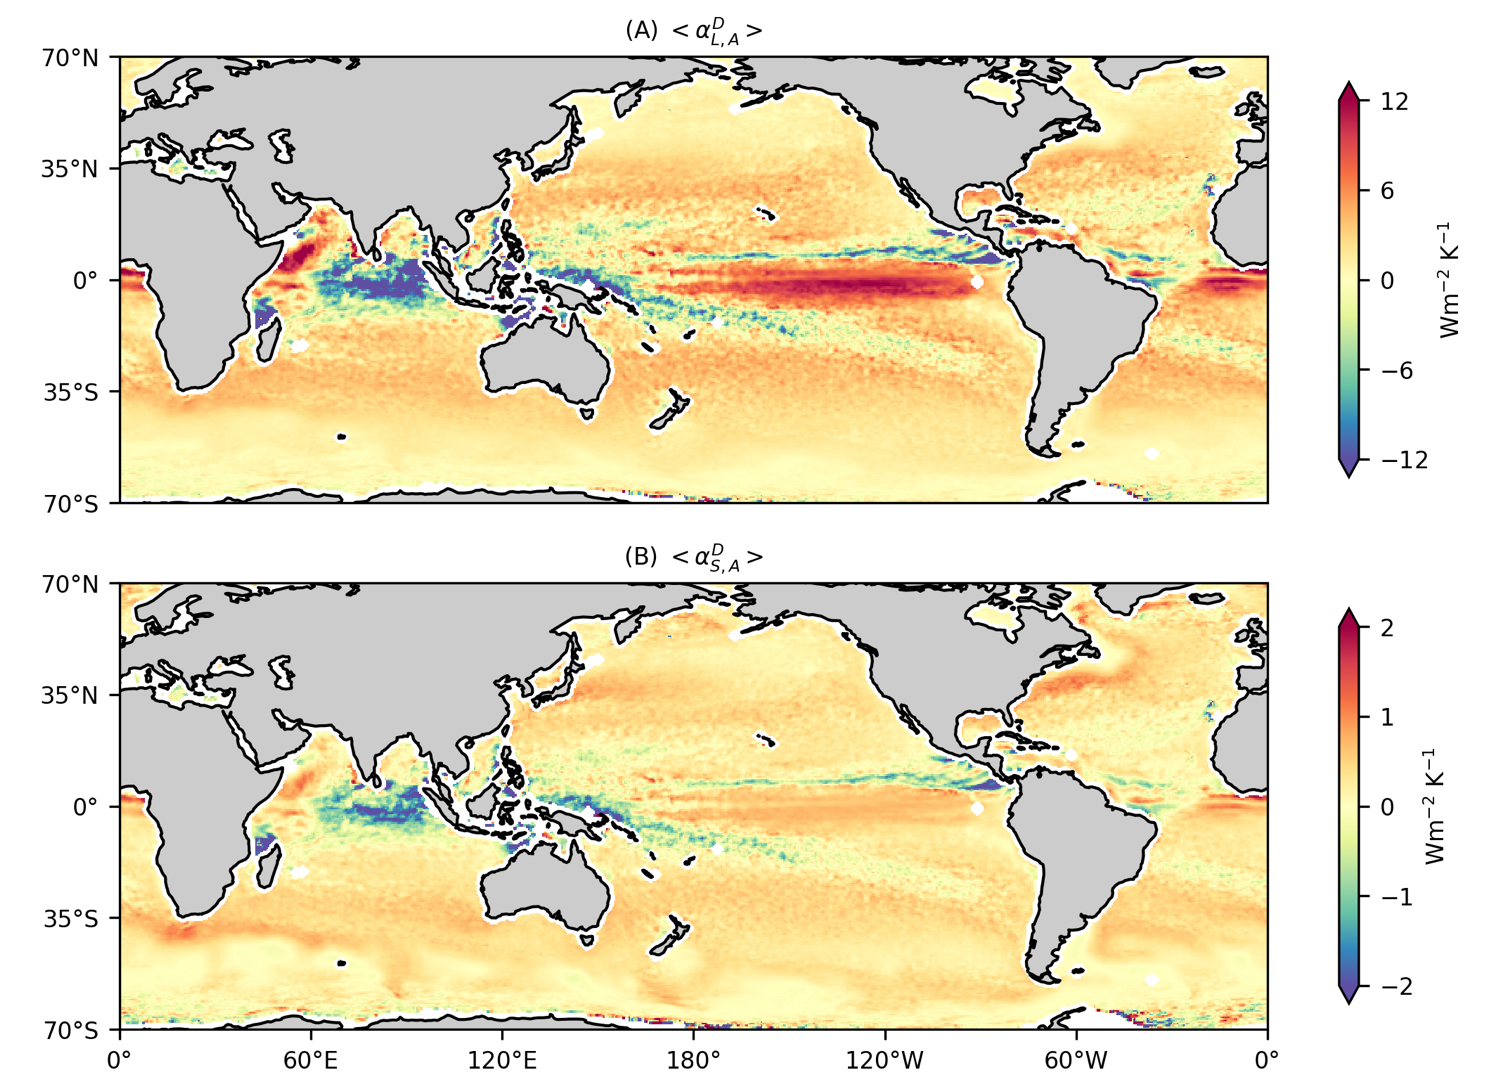


**Supplementary Fig. S4** **(A)**  and **(B)** recomputed by the classical constant regression model.
